# Supplementary material
Source: Research Square preprint supplement (doi:10.21203/rs.3.rs-9975420/v1)
Supplement: Supplementary file 1 [file 228960e13b21b37621aa345d.docx]

**Association between C-reactive protein-triglyceride-glucose index and the progress of frailty: two nationwide prospective cohort studies**

**Authors**: Zhen-Yu Liu1,**†**, Zhi-Ran Yue1,**†**, Xiao-Qun Wang1,2*****, Rui-Yan Zhang1,2*****

**Affiliation:**

1 Department of Cardiovascular Medicine, Ruijin Hospital, Shanghai Jiao Tong University School of Medicine, 197 Ruijin Er Road, Shanghai, 200025, China.

2 Institute of Cardiovascular Diseases, Shanghai Jiao Tong University School of Medicine, Shanghai, 200025, China.

*** Corresponding author**

**† Co-first authors**

**Supplemental Content**

**Supplemental Table 1.** The 31 items used to construct the frailty index.

**Supplemental Table 2.** Univariate linear regression analyses for FI in baseline.

**Supplemental Table 3.** Univariate Cox regression analyses for the incidence of frailty.

**Supplemental Table 4.** The missing number and rate of covariates for baseline frailty analyses.

**Supplemental Table 5.** Association between CTI and FI in baseline using the new FI (30 items) after removing the diabetes item from original FI items (31 items).

**Supplemental Table 6.** Association between CTI and the incidence of frailty using the new FI (30 items) after removing the diabetes item from original FI items (31 items).

**Supplemental Table 7.** Association between CTI and the progress speed of FI using the new FI (30 items) after removing the diabetes item from original FI items (31 items).

**Supplemental Table 8.** Association between CTI and the incidence of frailty (excluding the time of frailty occurrence within 2 years to avoid reverse causality).

**Supplemental Table 9.** Association between CTI and the progress speed of FI (excluding the time of frailty occurrence within 2 years to avoid reverse causality).

**Supplemental Figure 1.** Association between CTI tertiles and the predicted FI trajectories across follow-up using the new FI (30 items) after removing the diabetes item from original FI items (31 items).

**Supplemental Figure 2.** Association between CTI tertiles and the predicted FI trajectories across follow-up (excluding the time of frailty occurrence within 2 years to avoid reverse causality).

**Supplemental Table1.** The 31 items used to construct the frailty index

| No | Description of the 31 items | | Cut-off value |
| --- | --- | --- | --- |
| CHARLS | ELSA |
| 1 | Self-reported physician diagnosed diabetes | | Yes = 1, No = 0 |
| 2 | Self-reported physician diagnosed cancer | | Yes = 1, No = 0 |
| 3 | Self-reported physician diagnosed chronic lung disease | | Yes = 1, No = 0 |
| 4 | Self-reported physician diagnosed arthritis | | Yes = 1, No = 0 |
| 5 | Self-reported physician diagnosed heart problems | | Yes = 1, No = 0 |
| 6 | Self-reported physician diagnosed stroke | | Yes = 1, No = 0 |
| 7 | Self-reported physician diagnosed any emotional, nervous, or psychiatric problems | | Yes = 1, No = 0 |
| 8 | Self-reported physician diagnosed memory-related disease | | Yes = 1, No = 0 |
| 9 | Self-reported distance eyesight | | Poor or fair = 1,  Excellent, very good, or good = 0 |
| 10 | Self-reported near eyesight | | Poor or fair = 1,  Excellent, very good, or good = 0 |
| 11 | Self-reported hearing (while using hearing aid if appropriate) | | Poor or fair = 1,  Excellent, very good, or good = 0 |
| 12 | Self-reported general health status | | Very poor or poor = 1, very good, good, or fair = 0 in the CHARLS;  Poor or fair = 1, excellent, very good, or good = 0 in the ELSA |
| 13 | Difficulty with dressing | | Yes = 1, No = 0 |
| 14 | Difficulty with bathing or showering | | Yes = 1, No = 0 |
| 15 | Difficulty with eating | | Yes = 1, No = 0 |
| 16 | Difficulty with getting in and out of bed | | Yes = 1, No = 0 |
| 17 | Difficulty with using the toilet | | Yes = 1, No = 0 |
| 18 | Difficulty with managing money | | Yes = 1, No = 0 |
| 19 | Difficulty with taking medication | | Yes = 1, No = 0 |
| 20 | Difficulty with shopping for groceries | | Yes = 1, No = 0 |
| 21 | Difficulty with preparing meals | | Yes = 1, No = 0 |
| 22 | Mobility: difficulty with walking 100 yards or one block | | Yes = 1, No = 0 |
| 23 | Mobility: difficulty with getting up from a chair after sitting for long periods | | Yes = 1, No = 0 |
| 24 | Mobility: difficulty with climbing several flights of stairs without resting | | Yes = 1, No = 0 |
| 25 | Mobility: difficulty with lifting or carrying weights over 10 pounds/jins | | Yes = 1, No = 0 |
| 26 | Mobility: difficulty with picking up a coin from the table | | Yes = 1, No = 0 |
| 27 | Mobility: difficulty with stooping, kneeling, or crouching | | Yes = 1, No = 0 |
| 28 | Mobility: difficulty with reaching arms above shoulder level | | Yes = 1, No = 0 |
| 29 | Depression: CESD-10 questionnaire | Depression: CESD-8 questionnaire | CHARLS: CESD-10 >10 = 1, ≤10 = 0  ELSA: CESD-8 ≥ 4 = 1, <4 = 0 |
| 30 | Cognition: memory test score **/** 10 | | Continuous variable, ranging from 0 to 1 |
| 31 | Cognition: orientation test score / 4 | | Continuous variable, ranging from 0 to 1 |

Memory-related disease included Alzheimer’s disease, dementia, organic brain senility, and other serious memory impairment.

Depression was assessed by the Center for Epidemiologic Studies Depression Scale (CESD). In the CHARLS, CESD-10 was used, and the total score ranged from 0 to 30. In the ELSA, CESD-8 was used, and the total score ranged from 0 to 8. A higher score indicated more severe depressive symptoms.

The memory score was the average of words which were not recalled in the immediate and delayed word recall tasks. The memory score ranged from 0 to 10.

The orientation test comprised 4 questions about the day of the week, the month, the date of the month, and the year. One point was given for each wrong answer, and the range was from 0 to 4.

CHARLS, China Health and Retirement Longitudinal Study; ELSA, English Longitudinal Study of Aging.

**Supplemental Table 2.** Univariate linear regression analyses for FI in baseline.

|  | CHARLS | | ELSA | |
| --- | --- | --- | --- | --- |
| Variables | β (95%CI) | P | β (95%CI) | P |
| Age | 0.24 (0.22,0.27) | < 0.001 | 0.22 (0.18,0.27) | < 0.001 |
| Sex (Ref. Male) | 1.28 (0.77,1.79) | < 0.001 | 1.93 (1.24,2.62) | < 0.001 |
| Education (Ref. Below high school) | |  |  |  |
| High school | -3.72 (-4.88,-2.57) | < 0.001 | -0.66 (-1.72,0.41) | 0.228 |
| College or above | -5.00 (-6.69,-3.31) | < 0.001 | -0.38 (-1.12,0.37) | 0.320 |
| Marital status (Ref. Married or partnered) | 2.03 (1.31,2.75) | < 0.001 | 2.88 (2.08,3.67) | < 0.001 |
| Smoking status (Ref. Non-current smokers) | -0.36 (-0.89,0.16) | 0.172 | 3.07 (2.08,4.07) | < 0.001 |
| Drinking status (Ref. Non-current drinkers) | -2.05 (-2.6,-1.5) | < 0.001 | -3.36 (-4.2,-2.52) | < 0.001 |
| Physical activity (Ref. Inactive) | |  |  |  |
| Light | -4.21 (-5.07,-3.34) | < 0.001 | -4.00 (-6.75,-1.25) | 0.004 |
| Moderate | -7.31 (-8.14,-6.47) | < 0.001 | -13.16 (-15.66,-10.67) | < 0.001 |
| Vigorous | -7.36 (-8.18,-6.53) | < 0.001 | -17.12 (-19.61,-14.63) | < 0.001 |
| BMI | -0.09 (-0.15,-0.03) | 0.003 | 0.41 (0.34,0.48) | < 0.001 |
| HDL-C | 0 (-0.02,0.01) | 0.548 | -1.57 (-2.48,-0.67) | < 0.001 |
| LDL-C | 0 (-0.01,0.01) | 0.874 | -0.79 (-1.15,-0.44) | < 0.001 |

For continuous independent variables, β represents the average change of FI in baseline with a 1-unit increase in the independent variable. CHARLS, China Health and Retirement Longitudinal Study; ELSA, English Longitudinal Study of Aging; β, coefficient; CI, confidence intervals; BMI, body mass index; HDL-C, high density lipoprotein cholesterol; LDL-C, low density lipoprotein cholesterol.

**Supplemental Table 3.** Univariate Cox regression analyses for the incidence of frailty.

|  | CHARLS | | ELSA | |
| --- | --- | --- | --- | --- |
| Variables | HR (95%CI) | P | HR (95%CI) | P |
| Age | 1.03 (1.02,1.04) | < 0.001 | 1.08 (1.08,1.09) | < 0.001 |
| Sex (Ref. Male) | 1.23 (1.12,1.35) | < 0.001 | 1.42 (1.25,1.60) | < 0.001 |
| Education (Ref. Below high school) | |  |  |  |
| High school | 0.54 (0.42,0.69) | < 0.001 | 0.94 (0.78,1.13) | 0.493 |
| College or above | 0.44 (0.29,0.67) | < 0.001 | 0.92 (0.81,1.05) | 0.238 |
| Marital status (Ref. Married or partnered) | 1.43 (1.26,1.62) | < 0.001 | 1.68 (1.47,1.92) | < 0.001 |
| Smoking status (Ref. Non-current smokers) | 0.95 (0.87,1.05) | 0.339 | 1.33 (1.12,1.58) | 0.001 |
| Drinking status (Ref. Non-current drinkers) | 0.78 (0.7,0.87) | < 0.001 | 0.59 (0.51,0.67) | < 0.001 |
| Physical activity (Ref. Inactive) | |  |  |  |
| Light | 0.92 (0.78,1.1) | 0.362 | 0.70 (0.43,1.16) | 0.17 |
| Moderate | 0.81 (0.69,0.96) | 0.015 | 0.35 (0.22,0.56) | < 0.001 |
| Vigorous | 0.77 (0.66,0.91) | 0.002 | 0.20 (0.13,0.32) | < 0.001 |
| BMI | 1.00 (0.99,1.01) | 0.616 | 1.07 (1.06,1.08) | < 0.001 |
| HDL-C | 1.00 (1.00,1.01) | 0.148 | 0.65 (0.55,0.76) | < 0.001 |
| LDL-C | 1.00 (1.00,1.01) | 0.953 | 0.88 (0.82,0.94) | < 0.001 |

For continuous independent variables, HR represents the change in frailty risk associated with a 1-unit increase in the independent variable. CHARLS, China Health and Retirement Longitudinal Study; ELSA, English Longitudinal Study of Aging; HR, hazard ratio; CI, confidence intervals; BMI, body mass index; HDL-C, high density lipoprotein cholesterol; LDL-C, low density lipoprotein cholesterol.

**Supplemental Table 4.** The missing number and rate of covariates for baseline frailty analyses

| **Variable** | CHARLS | ELSA |
| --- | --- | --- |
| **Number** | 6,524 | 3,026 |
| **Age** | 0 (0.00%) | 0 (0.00%) |
| **Sex** | 0 (0.00%) | 0 (0.00%) |
| **Education** | 3 (0.06%) | 2190 (72.37%) |
| **Marital status** | 0 (0.00%) | 0 (0.00%) |
| **Smoking status** | 0 (0.00%) | 8 (0.26%) |
| **Drinking status** | 1 (0.02%) | 169 (5.58%) |
| **Physical activity** | 948 (14.53%) | 1 (0.03%) |
| **BMI** | 859 (13.17%) | 208 (6.87%) |
| **HDL-C** | 1 (0.02%) | 4 (0.13%) |
| **LDL-C** | 13 (0.20%) | 55 (1.82%) |
| **HbA1c** | 0 (0.00%) | 53 (1.75%) |
| **Glucose** | 0 (0.00%) | 0 (0.00%) |
| **Diabetes** | 0 (0.00%) | 0 (0.00%) |

T1 was the lowest tertile, T2 was the middle tertile, and T3 was the highest tertile. In the CHARLS, T1 of CTI ≤ 8.40, 8.40 < T2 <9.08, T3 of CTI ≥ 9.08. In the ELSA, T1 of CTI ≤ 8.54, 8.54 < T2 <9.25, T3 of CTI ≥ 9.25.

CHARLS, China Health and Retirement Longitudinal Study; ELSA, English Longitudinal Study of Aging; BMI, body mass index; TC, total cholesterol; HDL-C, high density lipoprotein cholesterol; LDL-C, low-density lipoprotein cholesterol HbA1c, Hemoglobin A1c.

**Supplemental Table 5.** Association between CTI and FI in baseline using the new FI (30 items) after removing the diabetes item from original FI items (31 items).

| Variables | CHARLS | | | | | ELSA | | | | |
| --- | --- | --- | --- | --- | --- | --- | --- | --- | --- | --- |
| CTI Tertiles | Total | Univariate Model  β (95% CI) | P | Fully-adjusted Model  β (95% CI) | P | Total | Univariate Model  β (95% CI) | P | Fully-adjusted Model  β (95% CI) | P |
| T1 | 2175 | [Reference] |  | [Reference] |  | 1009 | [Reference] |  | [Reference] |  |
| T2 | 2174 | 0.69 (0.07~1.30) | 0.030 | 0.71 (0.10~1.32) | 0.022 | 1008 | 1.81 (0.96~2.66) | <0.001 | 0.35 (-0.47~1.17) | 0.401 |
| T3 | 2175 | 1.37 (0.75~1.99) | <0.001 | 1.29 (0.61~1.97) | <0.001 | 1009 | 4.54 (3.69~5.39) | <0.001 | 1.74 (0.83~2.64) | <0.001 |
| P for Trend |  |  | <0.001 |  | <0.001 |  |  | <0.001 |  | <0.001 |
| CTI per 1-unit | 6524 | 0.68 (0.39~0.98) | <0.001 | 0.72 (0.39~1.05) | <0.001 | 3026 | 2.55 (2.09~3.01) | <0.001 | 0.99 (0.49~1.50) | <0.001 |

Multivariable linear regression models were performed to examine the cross-sectional association between CTI and baseline FI. Fully-adjusted Model: age, sex, education, marital status, smoking status, drinking status, physical activity, BMI, HDL-C, LDL-C. T1 was the lowest tertile, T2 was the middle tertile, and T3 was the highest tertile. In the CHARLS, T1 of CTI ≤ 8.40, 8.40 < T2 <9.08, T3 of CTI ≥ 9.08. In the ELSA, T1 of CTI ≤8.54, 8.54 < T2 <9.25, T3 of CTI ≥ 9.25. CHARLS, China Health and Retirement Longitudinal Study; ELSA, English Longitudinal Study of Aging; CTI, C-reactive protein-triglyceride-glucose index; β, coefficient; T, tertile; CI, confidence intervals; FI, frailty index; BMI, body mass index; HDL-C, high density lipoprotein cholesterol; LDL-C, low density lipoprotein cholesterol.

**Supplemental Table 6.** Association between CTI and the incidence of frailty using the new FI (30 items) after removing the diabetes item from original FI items (31 items).

| Variables | CHARLS | | | | | ELSA | | | | |
| --- | --- | --- | --- | --- | --- | --- | --- | --- | --- | --- |
| CTI Tertiles | Cases/Total | Univariate Model  HR (95% CI) | P | Fully-adjusted Model  HR (95% CI) | P | Cases/Total | Univariate Model  HR (95% CI) | P | Fully-adjusted Model  HR (95% CI) | P |
| T1 | 638/1734 | [Reference] |  | [Reference] |  | 314/965 | [Reference] |  | [Reference] |  |
| T2 | 634/1654 | 1.06 (0.95~1.18) | 0.318 | 1.05 (0.93~1.17) | 0.431 | 367/935 | 1.36 (1.17~1.58) | <0.001 | 1.04 (0.88~1.22) | 0.645 |
| T3 | 631/1610 | 1.08 (0.97~1.21) | 0.171 | 1.08 (0.95~1.22) | 0.249 | 411/870 | 1.88 (1.62~2.18) | <0.001 | 1.17 (0.99~1.39) | 0.068 |
| P for Trend |  |  | 0.169 |  | 0.247 |  |  | <0.001 |  | 0.058 |
| CTI per 1-unit | 1903/4998 | 1.07 (1.02~1.12) | 0.007 | 1.09 (1.03~1.16) | 0.005 | 1092/2770 | 1.43 (1.32~1.54) | <0.001 | 1.10 (0.99~1.21) | 0.062 |

Multivariable Cox proportional hazards regression models were used to estimate the risk of incident frailty. Fully-adjusted Model: age, sex, education, marital status, smoking status, drinking status, physical activity, BMI, HDL-C, LDL-C. T1 was the lowest tertile, T2 was the middle tertile, and T3 was the highest tertile. In the CHARLS, T1 of CTI ≤ 8.40, 8.40 < T2 <9.08, T3 of CTI ≥ 9.08. In the ELSA, T1 of CTI ≤8.54, 8.54 < T2 <9.25, T3 of CTI ≥ 9.25. CHARLS, China Health and Retirement Longitudinal Study; ELSA, English Longitudinal Study of Aging. HR, hazard ratio; T, tertile; CI, confidence intervals; CTI, C-reactive protein-triglyceride-glucose index; BMI, body mass index; HDL-C, high density lipoprotein cholesterol; LDL-C, low density lipoprotein cholesterol.

**Supplemental Table 7.** Association between CTI and the progress speed of FI using the new FI (30 items) after removing the diabetes item from original FI items (31 items).

| Variables | CHARLS | | | | | ELSA | | | | |
| --- | --- | --- | --- | --- | --- | --- | --- | --- | --- | --- |
| CTI Tertiles | Total | Univariate Model  β (95% CI) | P | Fully-adjusted Model  β (95% CI) | P | Total | Univariate Model  β (95% CI) | P | Fully-adjusted Model  β (95% CI) | P |
| T1 | 2175 | [Reference] |  | [Reference] |  | 1009 | [Reference] |  | [Reference] |  |
| T2 | 2174 | 0.123 (-0.011, 0.258) | 0.072 | 0.122 (-0.012, 0.257) | 0.074 | 1008 | 0.185 (0.098, 0.272) | <0.001 | 0.180 (0.093, 0.267) | <0.001 |
| T3 | 2175 | 0.311 (0.176, 0.447) | <0.001 | 0.309 (0.174, 0.445) | <0.001 | 1009 | 0.295 (0.207, 0.383) | <0.001 | 0.289 (0.202, 0.377) | <0.001 |
| P for Trend |  |  | <0.001 |  | <0.001 |  |  | <0.001 |  | <0.001 |
| CTI per 1-unit | 6524 | 0.155 (0.087, 0.223) | <0.001 | 0.154 (0.086, 0.222) | <0.001 | 3026 | 0.148 (0.104, 0.192) | <0.001 | 0.145 (0.101, 0.189) | <0.001 |

Linear mixed-effects models were employed to analyze the longitudinal trajectories of the FI over the follow-up period. Fully-adjusted Model: age, sex, education, marital status, smoking status, drinking status, physical activity, BMI, HDL-C, LDL-C. T1 was the lowest tertile, T2 was the middle tertile, and T3 was the highest tertile. In the CHARLS, T1 of CTI ≤ 8.40, 8.40 < T2 <9.08, T3 of CTI ≥ 9.08. In the ELSA, T1 of CTI ≤8.54, 8.54 < T2 <9.25, T3 of CTI ≥ 9.25. CHARLS, China Health and Retirement Longitudinal Study; ELSA, English Longitudinal Study of Aging. CTI, C-reactive protein-triglyceride-glucose index; β, coefficient; T, tertile; CI, confidence intervals; FI, frailty index; BMI, body mass index; HDL-C, high density lipoprotein cholesterol; LDL-C, low density lipoprotein cholesterol.

**Supplemental Table 8.** Association between CTI and the incidence of frailty (excluding the time of frailty occurrence within 2 years to avoid reverse causality).

| Variables | CHARLS | | | | | ELSA | | | | |
| --- | --- | --- | --- | --- | --- | --- | --- | --- | --- | --- |
| CTI Tertiles | Cases/Total | Univariate Model  HR (95% CI) | P | Fully-adjusted Model  HR (95% CI) | P | Cases/Total | Univariate Model  HR (95% CI) | P | Fully-adjusted Model  HR (95% CI) | P |
| T1 | 404/1528 | [Reference] |  | [Reference] |  | 242/925 | [Reference] |  | [Reference] |  |
| T2 | 385/1424 | 1.02 (0.89~1.18) | 0.745 | 1.03 (0.89~1.19) | 0.688 | 294/874 | 1.46 (1.23~1.73) | <0.001 | 1.12 (0.94~1.35) | 0.206 |
| T3 | 376/1332 | 1.10 (0.95~1.26) | 0.189 | 1.12 (0.95~1.32) | 0.161 | 309/782 | 1.97 (1.66~2.33) | <0.001 | 1.22 (1.01~1.49) | 0.044 |
| P for Trend |  |  | 0.194 |  | 0.167 |  |  | <0.001 |  | 0.045 |
| CTI per 1-unit | 1165/4284 | 1.09 (1.02~1.17) | 0.011 | 1.13 (1.04~1.22) | 0.004 | 845/2581 | 1.47 (1.34~1.60) | <0.001 | 1.13 (1.01~1.26) | 0.034 |

Multivariable Cox proportional hazards regression models were used to estimate the risk of incident frailty. Fully-adjusted Model: age, sex, education, marital status, smoking status, drinking status, physical activity, BMI, HDL-C, LDL-C. T1 was the lowest tertile, T2 was the middle tertile, and T3 was the highest tertile. In the CHARLS, T1 of CTI ≤ 8.40, 8.40 < T2 <9.08, T3 of CTI ≥ 9.08. In the ELSA, T1 of CTI ≤8.54, 8.54 < T2 <9.25, T3 of CTI ≥ 9.25. CHARLS, China Health and Retirement Longitudinal Study; ELSA, English Longitudinal Study of Aging. HR, hazard ratio; T, tertile; CI, confidence intervals; CTI, C-reactive protein-triglyceride-glucose index; BMI, body mass index; HDL-C, high density lipoprotein cholesterol; LDL-C, low density lipoprotein cholesterol.

**Supplemental Table 9.** Association between CTI and the progress speed of FI (excluding the time of frailty occurrence within 2 years to avoid reverse causality).

| Variables | CHARLS | | | | | ELSA | | | | |
| --- | --- | --- | --- | --- | --- | --- | --- | --- | --- | --- |
| CTI Tertiles | Total | Univariate Model  β (95% CI) | P | Fully-adjusted Model  β (95% CI) | P | Total | Univariate Model  β (95% CI) | P | Fully-adjusted Model  β (95% CI) | P |
| T1 | 2175 | [Reference] |  | [Reference] |  | 1009 | [Reference] |  | [Reference] |  |
| T2 | 2174 | 0.082 (-0.053, 0.216) | 0.233 | 0.080 (-0.055, 0.215) | 0.243 | 1008 | 0.194 (0.110, 0.279) | <0.001 | 0.191 (0.107, 0.276) | <0.001 |
| T3 | 2175 | 0.259 (0.124, 0.395) | <0.001 | 0.257 (0.122, 0.393) | <0.001 | 1009 | 0.310 (0.223, 0.397) | <0.001 | 0.307 (0.220, 0.395) | <0.001 |
| P for Trend |  |  | <0.001 |  | <0.001 |  |  | <0.001 |  | <0.001 |
| CTI per 1-unit | 6524 | 0.129 (0.061, 0.197) | <0.001 | 0.128 (0.060, 0.196) | <0.001 | 3026 | 0.157 (0.113, 0.200) | <0.001 | 0.155 (0.112, 0.199) | <0.001 |

Linear mixed-effects models were employed to analyze the longitudinal trajectories of the FI over the follow-up period. Fully-adjusted Model: age, sex, education, marital status, smoking status, drinking status, physical activity, BMI, HDL-C, LDL-C. T1 was the lowest tertile, T2 was the middle tertile, and T3 was the highest tertile. In the CHARLS, T1 of CTI ≤ 8.40, 8.40 < T2 <9.08, T3 of CTI ≥ 9.08. In the ELSA, T1 of CTI ≤8.54, 8.54 < T2 <9.25, T3 of CTI ≥ 9.25. CHARLS, China Health and Retirement Longitudinal Study; ELSA, English Longitudinal Study of Aging. CTI, C-reactive protein-triglyceride-glucose index; β, coefficient; T, tertile; CI, confidence intervals; FI, frailty index; BMI, body mass index; HDL-C, high density lipoprotein cholesterol; LDL-C, low density lipoprotein cholesterol.

**Supplemental Figure 1.** Association between CTI tertiles and the predicted FI trajectories across follow-up using the new FI (30 items) after removing the diabetes item from original FI items (31 items). T1 was the lowest tertile, T2 was the middle tertile, and T3 was the highest tertile. In the CHARLS, T1 of CTI ≤ 8.40, 8.40 < T2 <9.08, T3 of CTI ≥ 9.08. In the ELSA, T1 of CTI ≤8.54, 8.54 < T2 <9.25, T3 of CTI ≥ 9.25. CTI, C-reactive protein-triglyceride-glucose index; FI, frailty index.


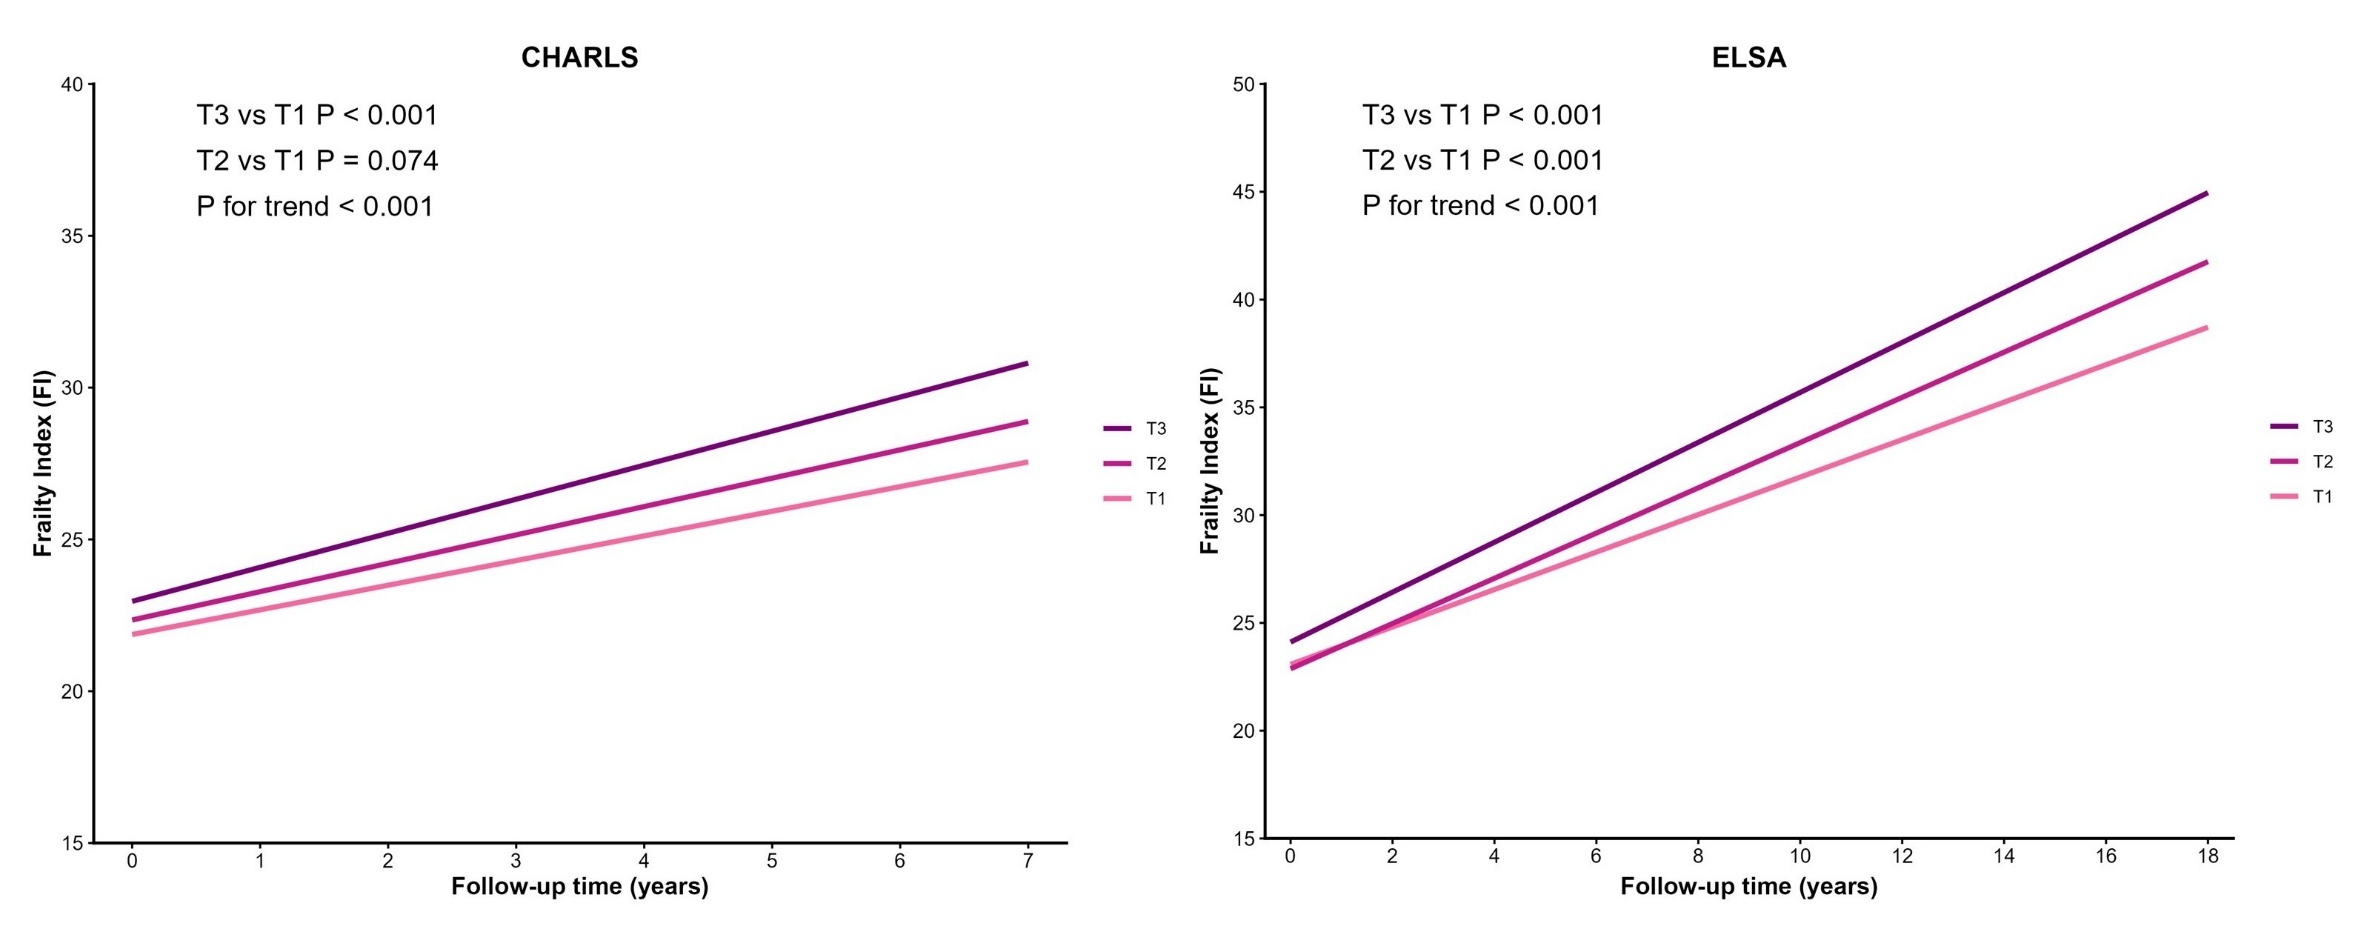


**Supplemental Figure 2.** Association between CTI tertiles and the predicted FI trajectories across follow-up (excluding the time of frailty occurrence within 2 years to avoid reverse causality). T1 was the lowest tertile, T2 was the middle tertile, and T3 was the highest tertile. In the CHARLS, T1 of CTI ≤ 8.40, 8.40 < T2 <9.08, T3 of CTI ≥ 9.08. In the ELSA, T1 of CTI ≤8.54, 8.54 < T2 <9.25, T3 of CTI ≥ 9.25. CTI, C-reactive protein-triglyceride-glucose index; FI, frailty index.

**
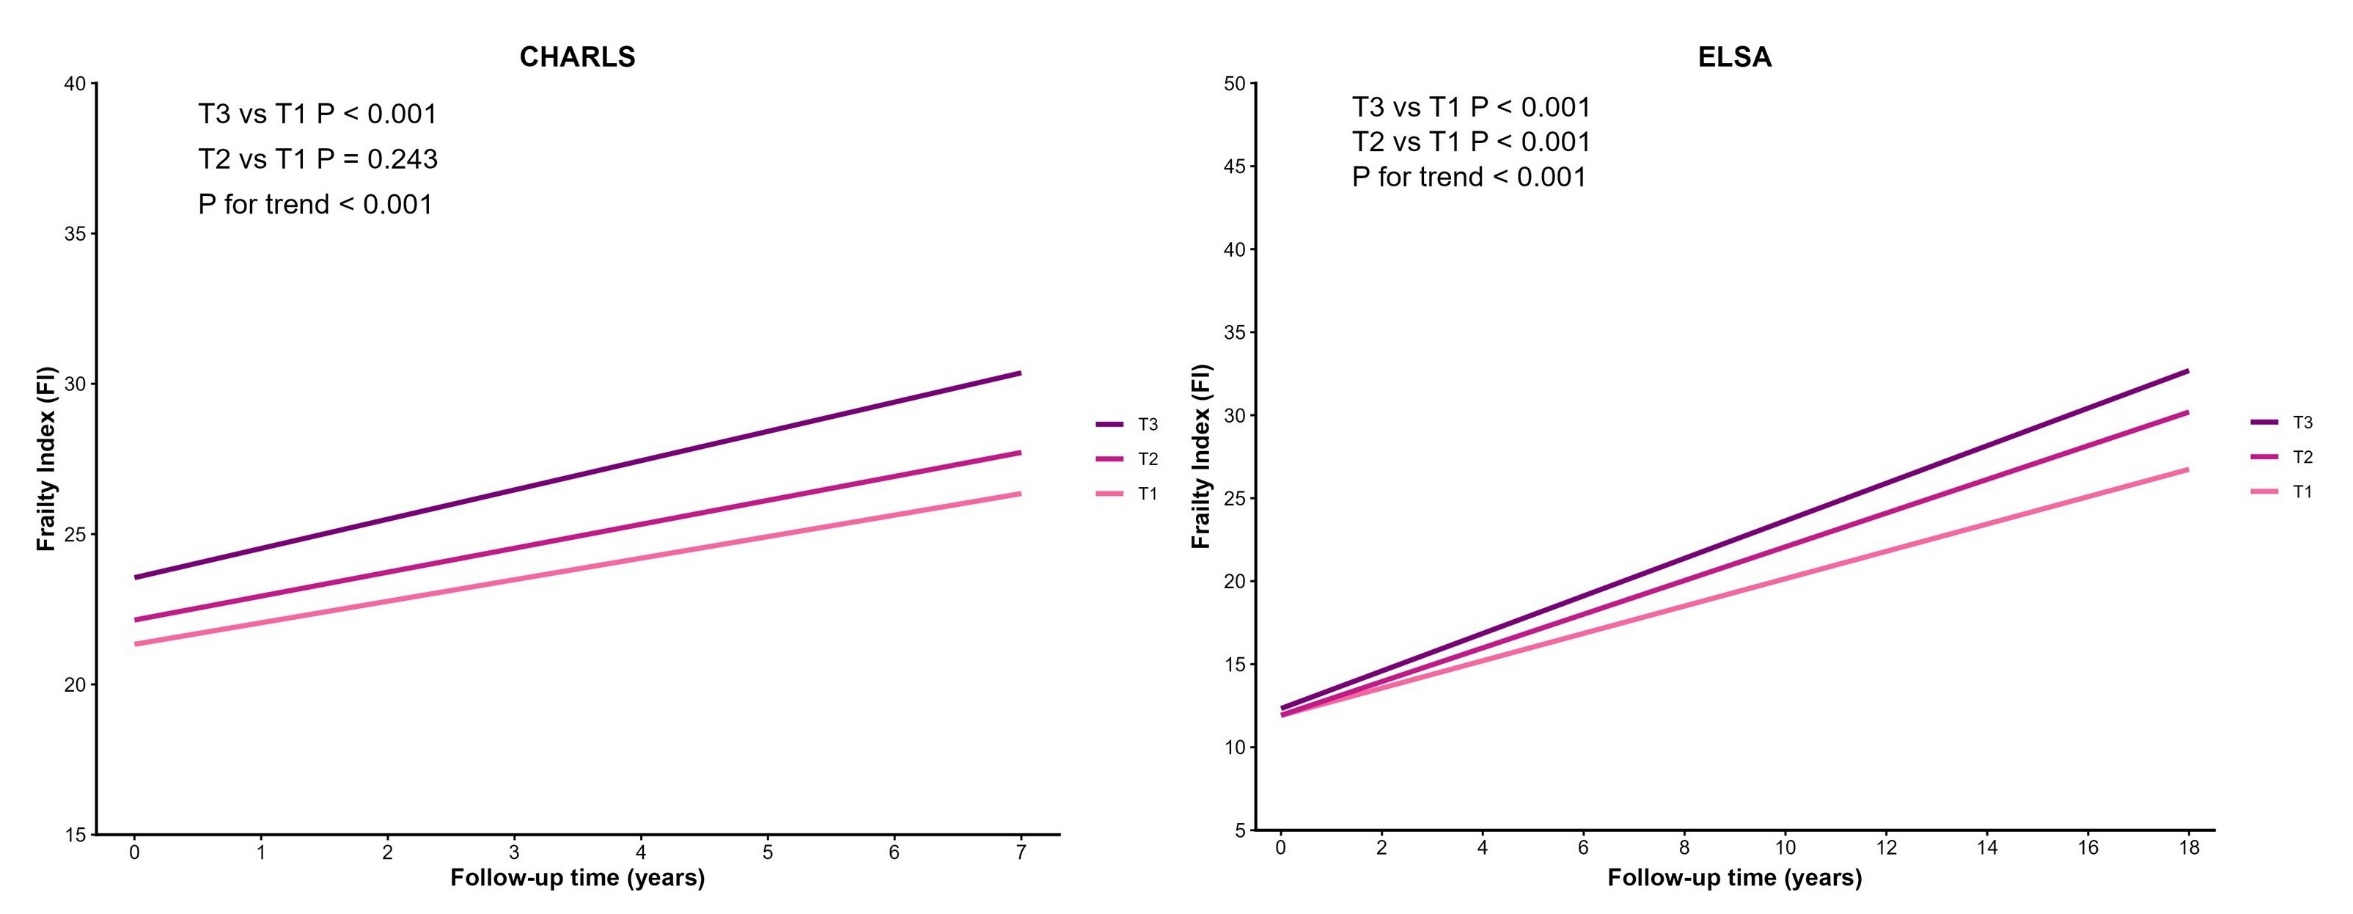
**
